# Supplementary material
Source: PubMed Central journal article supplement (PMC2243238)
Supplement: NIHMS37351-supplement-01.pdf [file NIHMS37351-supplement-01.pdf]

Cancer Cell, Volume 13

**Supplemental Data**

**An E2F1-Dependent Gene Expression Program  
that Determines the Balance  
between Proliferation and Cell Death**

Timothy C. Hallstrom, Seiichi Mori, and Joseph R. Nevins

## Supplementary Figure 1

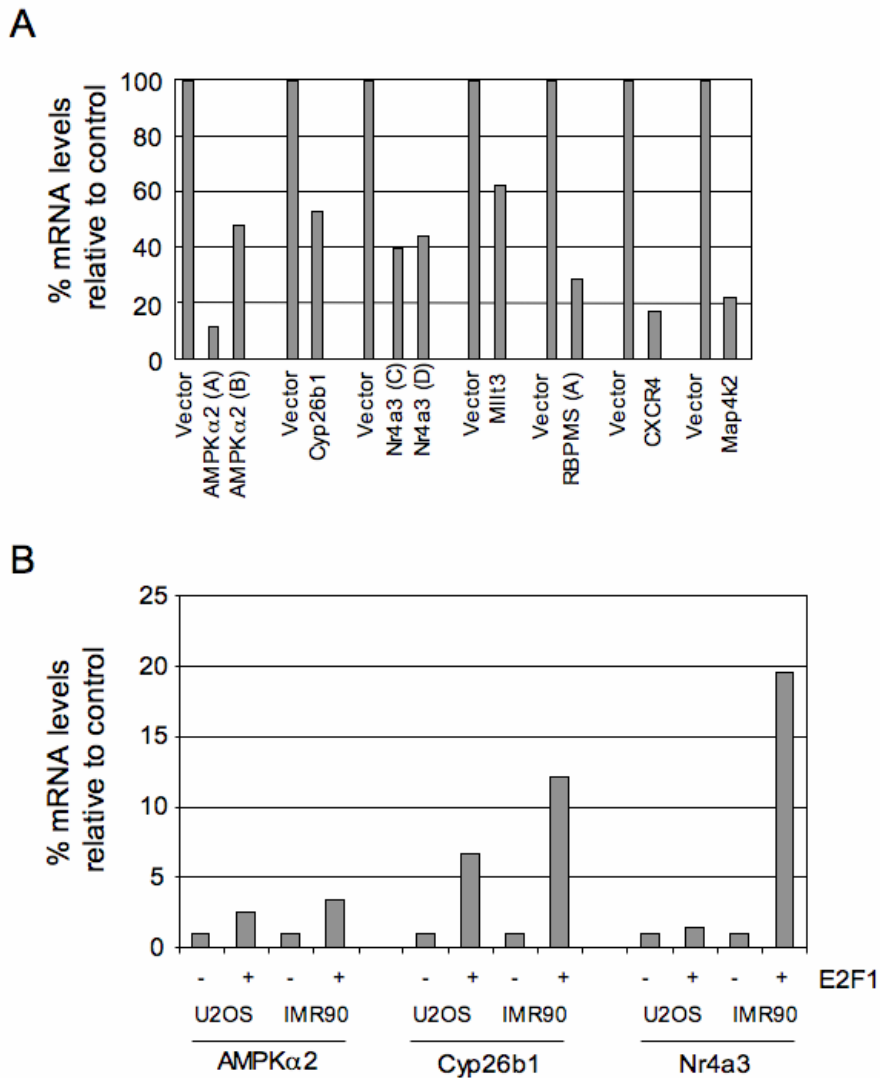

**Figure S1. Expression levels in shRNA stable cell lines and E2F1 induction in U2OS and IMR90 cells.**

A. Quantitative real-time PCR was used to measure mRNA levels of each gene in the knockdown cell lines compared with the levels measured in asynchronously growing control cells. Primers used for this analysis are listed in supplemental data.

B. U2OS and IMR90 cells were serum-deprived for 48 hours, infected with control or E2F1 expressing adenovirus (3 moi U2OS, 20 moi IMR90) and mRNA harvested 24 hours post-infection for real time PCR analysis of AMPKa2, Cyp26b1 and Nr4a3 fold changes caused by E2F1 expression.

## Supplementary Figure 2

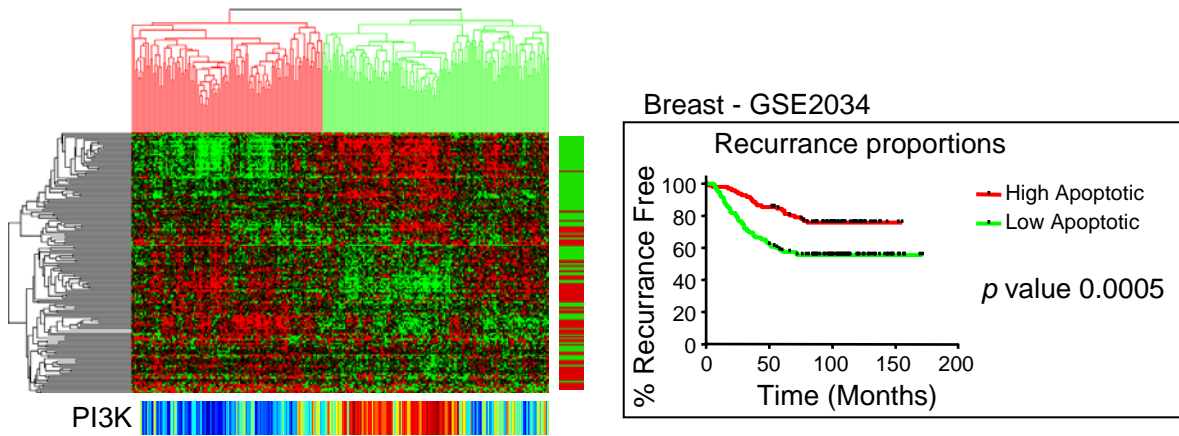

**Figure S2. Analysis of E2F1 target gene expression in human cancers.**

Breast tumors (GSE2034) were analyzed as described in Figure 5 and are also segregated into two major groups defined by high or low expression levels of the PI3K repressed and non-repressed E2F1 targets. PI3K gene expression signatures were used to predict the activation state of the PI3K pathway (blue representing low activity and red, high activity) and are displayed below the clustered genes. The tumors are separated into two groups based on their expression of PI3K repressed E2F1 targets, again designated either 'high apoptotic' or 'low apoptotic' and patients were separated using Kaplan-Meier curves for the recurrence (rather than survival) outcomes.

## Supplementary Table 1

**A**

| <i>E2F1 Target Genes Not Repressed by PI3K signaling</i> |    |          |  |
|----------------------------------------------------------|----|----------|--|
| Gene Ontology                                            | BF | p-value  |  |
| GO:0007049 [5]: cell cycle                               | 44 | < 0.0001 |  |
| GO:000067 [6]: DNA replication and chromosome cycle      | 35 | < 0.0001 |  |
| GO:0008283 [4]: cell proliferation                       | 35 | < 0.0001 |  |
| GO:0000278 [6]: mitotic cell cycle                       | 28 | < 0.0001 |  |
| GO:0006260 [6]: DNA replication                          | 27 | < 0.0001 |  |
| GO:0007067 [8]: mitosis                                  | 26 | < 0.0001 |  |
| GO:0000087 [7]: M phase of mitotic cell cycle            | 26 | < 0.0001 |  |
| GO:0000279 [6]: M phase                                  | 24 | < 0.0001 |  |
| GO:0006259 [5]: DNA metabolism                           | 23 | < 0.0001 |  |
| GO:0000280 [7]: nuclear division                         | 22 | < 0.0001 |  |
| GO:0000910 [5]: cytokinesis                              | 16 | < 0.0001 |  |
| GO:0043283 [4]: biopolymer metabolism                    | 15 | < 0.0001 |  |
| KEGG Pathway                                             | BF | p-value  |  |
| path:hsa04110: Cell cycle                                | 18 | < 0.0001 |  |
| path:hsa00240: Pyrimidine metabolism                     | 10 | < 0.0001 |  |
| path:hsa00230: Purine metabolism                         | 4  | 0.0002   |  |
| TRANSFAC                                                 | BF | p-value  |  |
| VSE2F1_Q6_01                                             | 22 | < 0.0001 |  |
| VSE2F_Q2: E2F                                            | 14 | < 0.0001 |  |
| VSE2F_Q3: E2F                                            | 14 | < 0.0001 |  |
| VSE2F4DP1_01: E2F-4:DP-1 heterodimer                     | 14 | < 0.0001 |  |
| VSE2F_Q4_01                                              | 14 | < 0.0001 |  |
| V\$NFY_01: nuclear factor Y (Y-box binding factor)       | 14 | < 0.0001 |  |
| VSE2F1_Q4_01                                             | 13 | < 0.0001 |  |
| VSE2F_Q3                                                 | 13 | < 0.0001 |  |
| VSE2F1DP1_01: E2F-1:DP-1 heterodimer                     | 12 | < 0.0001 |  |
| VSE2F1_Q6: E2F-1                                         | 10 | < 0.0001 |  |
| VSE2F1DP2_01: E2F-1:DP-2 heterodimer                     | 10 | < 0.0001 |  |
| VSE2F_Q6_01                                              | 10 | < 0.0001 |  |
| VSE2F4DP2_01: E2F-4:DP-2 heterodimer                     | 9  | < 0.0001 |  |
| V\$NFY_Q6: nuclear factor Y (Y-box binding factor)       | 9  | < 0.0001 |  |
| VSE2F1DP1RB_01: Rb:E2F-1:DP-1 trimeric complex           | 8  | < 0.0001 |  |

**B**

| <i>E2F1 Target Genes Repressed by PI3K signaling</i>         |    |          |  |
|--------------------------------------------------------------|----|----------|--|
| Gene Ontology                                                | BF | p-value  |  |
| GO:0016055 [6]: Wnt receptor signaling pathway               | 2  | 0.003    |  |
| GO:0007049 [5]: cell cycle                                   | 1  | 0.010    |  |
| GO:0007222 [7]: frizzled signaling pathway                   | 1  | 0.011    |  |
| GO:0015871 [6]: choline transport                            | 1  | 0.014    |  |
| GO:0030511 [6]: positive regulation of TGF beta receptor sig | 1  | 0.014    |  |
| GO:0007379 [4]: segment specification                        | 1  | 0.014    |  |
| GO:0006793 [5]: phosphorus metabolism                        | 1  | 0.017    |  |
| GO:0006796 [6]: phosphate metabolism                         | 1  | 0.017    |  |
| KEGG Pathway                                                 | BF | p-value  |  |
| path:hsa00760: Nicotinate and nicotinamide metabolism        | 2  | 0.001    |  |
| path:hsa04910: Insulin signaling pathway                     | 2  | 0.002    |  |
| path:hsa00562: Inositol phosphate metabolism                 | 2  | 0.002    |  |
| path:hsa00061: Fatty acid biosynthesis (path 1)              | 1  | 0.007    |  |
| path:hsa04810: Regulation of actin cytoskeleton              | 1  | 0.007    |  |
| path:hsa04310: Wnt signaling pathway                         | 0  | 0.012    |  |
| TRANSFAC                                                     | BF | p-value  |  |
| VSE2F1_Q3_01                                                 | 14 | < 0.0001 |  |
| V\$KROX_Q6                                                   | 9  | < 0.0001 |  |
| VSE2F1_Q6: E2F-1                                             | 8  | < 0.0001 |  |
| VSE2F1_Q6_01                                                 | 5  | < 0.0001 |  |
| V\$SP3_Q3                                                    | 5  | 0.0001   |  |
| V\$MYC_MAX_B: c-Myc:Max binding sites                        | 5  | 0.0002   |  |
| VSE2F1_Q4: E2F-1                                             | 5  | 0.0002   |  |
| VSE2F_Q3_01                                                  | 4  | 0.0005   |  |
| VSE2F1DP1_01: E2F-1:DP-1 heterodimer                         | 4  | 0.0006   |  |
| V\$LXR_Q3                                                    | 4  | 0.0007   |  |
| V\$LXR_DR4_Q3                                                | 3  | 0.0008   |  |

**Table S1.** Gene annotation, KEGG pathway and TRANSFAC analysis of

PI3K repressed and non-repressed E2F1 target genes.

We analyzed gene annotation of these genes identified by fold-induction in Excel using the GATHER resource which displays representation of GO annotations, a Bayes Factor (BF) and a *p* value based on the level of that GO terms presence in the gene set. This analysis demonstrated that the set of non-PI3K repressed E2F target genes are significantly overrepresented for cell cycle (37/117), DNA replication, cell proliferation and mitotic genes. Furthermore, TRANSFAC analysis of these gene promoters indicated, as expected, that E2F binding motifs are significantly overrepresented in this list of genes (94/117). In contrast, the E2F1 target genes whose expression is blocked by PI3K signaling do not fall into any single category based on GO annotations. This indicates that these gene products may play roles in diverse biological

processes, or that not enough is known about the function of these genes to designate GO terms to them. We find, however, that approximately 89% of these genes are predicted to have E2F binding motifs in their promoters, indicating that E2F is likely to directly transcribe these genes.

### Supplemental Data

Open Biosystems shRNA constructs used in this study.

|             |         |                      |
|-------------|---------|----------------------|
| v2HS_57638  | Prkaa2  | CCGTTGATCTGTCTCTAGTT |
| v2HS_57640  | Prkaa2  | CAATATCTTTAATAGGTTAA |
| v2HS_57641  | Prkaa2  | CATGTAACAGGTAACCACAA |
| v2HS_35782  | Cyp26b1 | CGGGCATTATTGGGTTTAA  |
| v2HS_203095 | NR4A3   | CACTGAGCATGATCACAGAA |
| v2HS_203384 | NR4A3   | CTGAGTTACAGAGTAATTAA |
| v2HS_239201 | NR4A3   | CTAATTGCTGCAAAGTATAA |
| v2HS_239519 | NR4A3   | CTGTTTGCTTCCATAAACAA |
| v2HS_48465  | Mllt3   | CCTCCACCACCCTTACTAAA |
| v2HS_77739  | RBPMS   | CAATCTGTCTTGTGGGTATT |
| v2HS_77740  | RBPMS   | CTACTAGAAGGACGAACAAT |
| v2HS_56171  | NR2F1   | AACATTATGGGCATCGAGAA |
| v2HS_248986 | NR2F1   | GAGCTACAAAGCATGGGAAA |
| v2HS_70755  | CBX7    | CCCAGGGAATGGAATCTAGA |
| v2HS_70751  | CBX7    | GAGACTGTATAGCATCTATT |
| v2HS_96071  | LPHN1   | CAGCCGCCTGGACAACATTA |
| v2HS_172392 | CXCR4   | CAGCTGTTTATGCATAGATA |
| v2HS_172639 | ATF3    | GCTGGCTACTGTCTATTAAA |
| v2HS_172635 | ATF3    | CTCTTTATCCAACAGATAAA |
| v2HS_47611  | MAPK4   | CTGGGAAACACGGTATTTAA |

Real-time PCR primers used in this study:

| Probe Name     | Sequence              |
|----------------|-----------------------|
| Prkaa2.Hs.For  | ATCCGAAGTCAGAGCAAACC  |
| Prkaa2.Hs.Rev  | TTTTCACGTAATTGCCAGTCA |
| Cyp26b1.Hs.For | TCATTGAGAGCAGCAAGGAG  |
| Cyp26b1.Hs.Rev | GCAGCTGCATGATGAGTGA   |
| Nr4a3.Hs.For   | CGTCGAAACCGATGTCAGTA  |
| Nr4a3.Hs.Rev   | TAATGGGCTCTTTGGTTTGG  |
| Rbpms.Hs.For   | GAAGGACCGGGAAGATGAA   |
| Rbpms.Hs.Rev   | AGATAGAGCTCCCGAGGTTTG |
| Mllt3.Hs.For   | ACACAACACCCAGCAAAC    |
| Mllt3.Hs.Rev   | GTACGAACACCATCCAGTCG  |
| Gapdh.Hs.For   | GGGAAACTGTGGCGTGAT    |
| Gapdh.Hs.Rev   | GGAGGAGTGGGTGTCGCTGTT |

|                |                       |
|----------------|-----------------------|
| Prkaa2.Rn.For  | CCAAGTGATCAGCACTCCAA  |
| Prkaa2.Rn.Rev  | CAGTAGTCCACGGCAGACAG  |
| Cyp26b1.Rn.For | GAGAGACTGGTCACTGGTTGC |
| Cyp26b1.Rn.Rev | GTTCGCCCAGTAGGATCTTG  |
| Nr4a3.Rn.For   | GACTCTCCCCAATCCAGA    |
| Nr4a3.Rn.Rev   | TTGAGGGTCCAGGCTCAG    |
| Rbpms.Rn.For   | AGCCGAGAAGGAGAACACC   |
| Rbpms.Rn.Rev   | AATGGCCTGAAGAGCAGGTA  |
| Mllt3.Rn.For   | CGAGGAGGAGTCTGATGAGG  |
| Mllt3.Rn.Rev   | AGAGGCAGAGCTGCTTTCAC  |
| CDKN1B.Rn.For  | GGGTCTCAGGCAAACCTCTGA |
| CDKN1B.Rn.Rev  | TCTGTTGGCCCTTTTGT     |
| Gapdh.Rn.For   | ATGACAACCTTTGGCATCGTG |
| Gapdh.Rn.Rev   | GGATGCAGGGATGATGTTCT  |
